# Supplementary material for: Cobalt promoted copper manganese oxide catalysts for ambient temperature carbon monoxide oxidation
Source: Royal Society of Chemistry journal article supplement (doi:10.1039/b800052m), 2008-01-01
Supplement: b800052m.pdf [file b800052m.pdf]

Manuscript Ref.: B800052M

Title: Cobalt promoted copper manganese oxide catalysts for ambient temperature carbon monoxide oxidation

Authors: Christopher Jones, Stuart H. Taylor, Andrew Burrows, Mandy J. Crudace, Christopher J. Kiely and Graham J. Hutchings

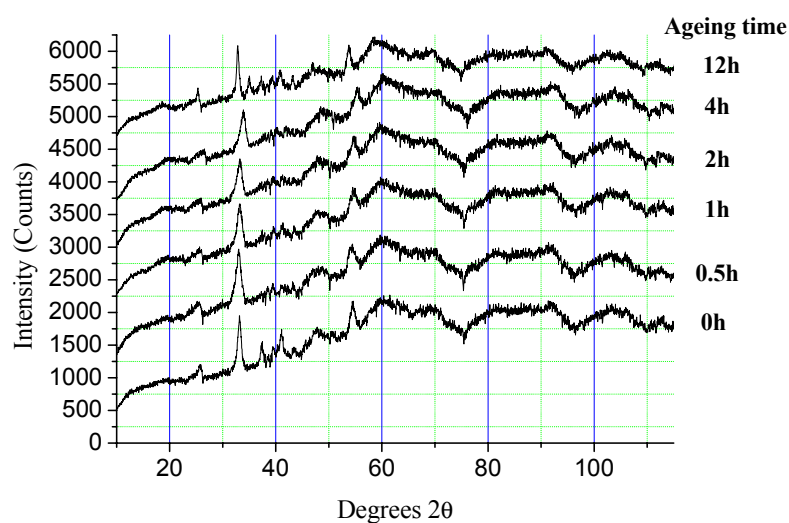

Figure 1: Powder X-Ray diffraction studies of CuMnO<sub>x</sub> catalyst precursors prepared with a range of ageing times

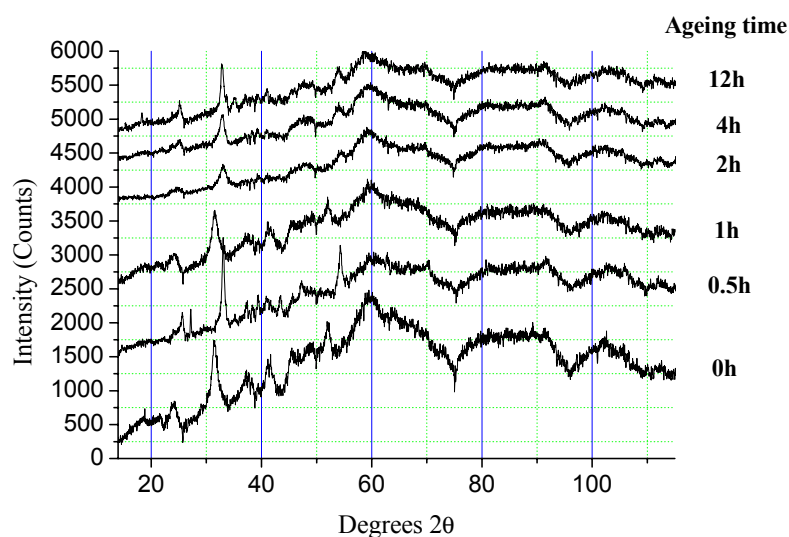

Figure 2: Powder X-Ray diffraction studies of 1%Co/CuMnO<sub>x</sub> catalyst precursors prepared with a range of ageing times

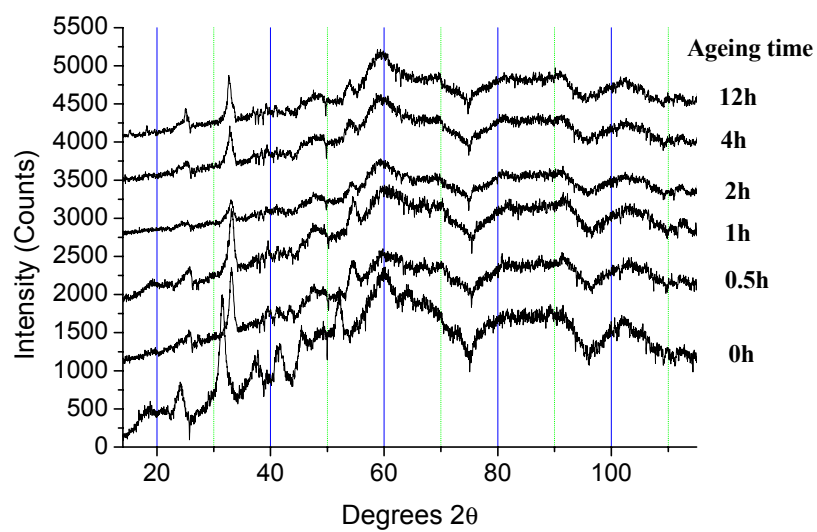

Figure 3: Powder X-Ray diffraction studies of 5%Co/CuMnO<sub>x</sub> catalyst precursors prepared with a range of ageing times
